# Supplementary material for: Regional variation in the effectiveness of methane-based and land-based climate mitigation options
Source: Copernicus journal article supplement (doi:10.5194/esd-2020-24), 2020-06-17
Supplement: Supplementary file 1 [file esd-2020-24-supplement.pdf]

# Regional variation in the effectiveness of methane and land-based climate mitigation options

5 Garry D. Hayman<sup>1,\*</sup>, Edward Comyn-Platt<sup>1</sup>, Chris Huntingford<sup>1</sup>, Anna B. Harper<sup>2</sup>, Tom Powell<sup>2</sup>, Peter M. Cox<sup>2</sup>, William Collins<sup>3</sup>, Christopher Webber<sup>3</sup>, Jason Lowe<sup>4,5</sup>, Stephen Sitch<sup>2</sup>, Joanna I. House<sup>6</sup>, Jonathan C. Doelman<sup>7</sup>, Detlef P. van Vuuren<sup>7,8</sup>, Sarah E. Chadburn<sup>2</sup>, Eleanor Burke<sup>5</sup>, Nicola Gedney<sup>9</sup>.

<sup>1</sup> Centre for Ecology & Hydrology, Wallingford, OX10 8BB, U.K.

<sup>2</sup> University of Exeter, Exeter, EX4 4QF, U.K.

<sup>3</sup> University of Reading, Reading, RG6 6BB, U.K.

<sup>4</sup> University of Leeds, Leeds, LS2 9JT, U.K.

10 <sup>5</sup> Met Office Hadley Centre, FitzRoy Road, Exeter, EX1 3PB, U.K.

<sup>6</sup> Cabot Institute for the Environment, University of Bristol, Bristol, BS8 1SS, U.K.

<sup>7</sup> Department of Climate, Air and Energy, Netherlands Environmental Assessment Agency (PBL), PO Box 30314, 2500 GH The Hague, Netherlands

15 <sup>8</sup> Copernicus Institute of Sustainable Development, Utrecht University, Heidelberglaan 2, 3584 CS, the Netherlands

<sup>9</sup> Met Office Hadley Centre, Joint Centre for Hydrometeorological Research, Wallingford, OX10 8BB, U.K.

*Correspondence to:* Garry Hayman ([garr@ceh.ac.uk](mailto:garr@ceh.ac.uk))

## Supplementary Information

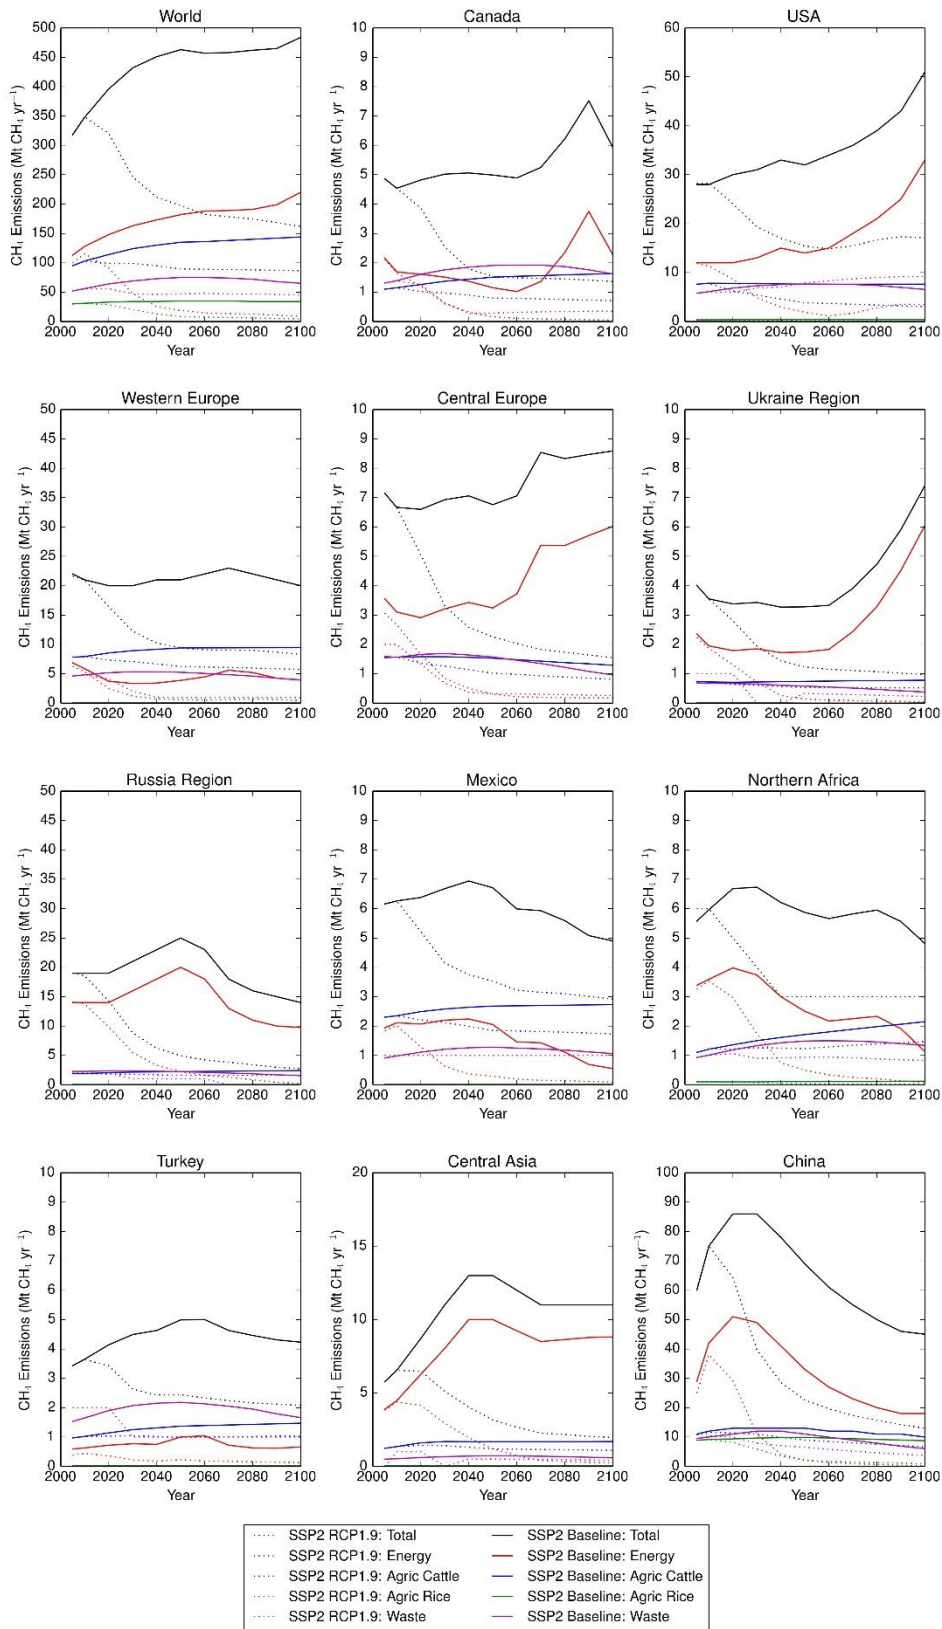

**Fig. SI.1** | Time series of annual methane emissions between 2005 and 2100 from all and selected anthropogenic sources according to the IMAGE SSP2 Baseline (solid lines) and SSP2-RCP1.9 (dotted lines) scenarios, globally and for each of the 26 IMAGE regions, with total emissions in black, energy sector in red, agriculture-cattle in blue, agriculture-rice in green and waste in magenta. Note the y-axes have different scales for clarity.

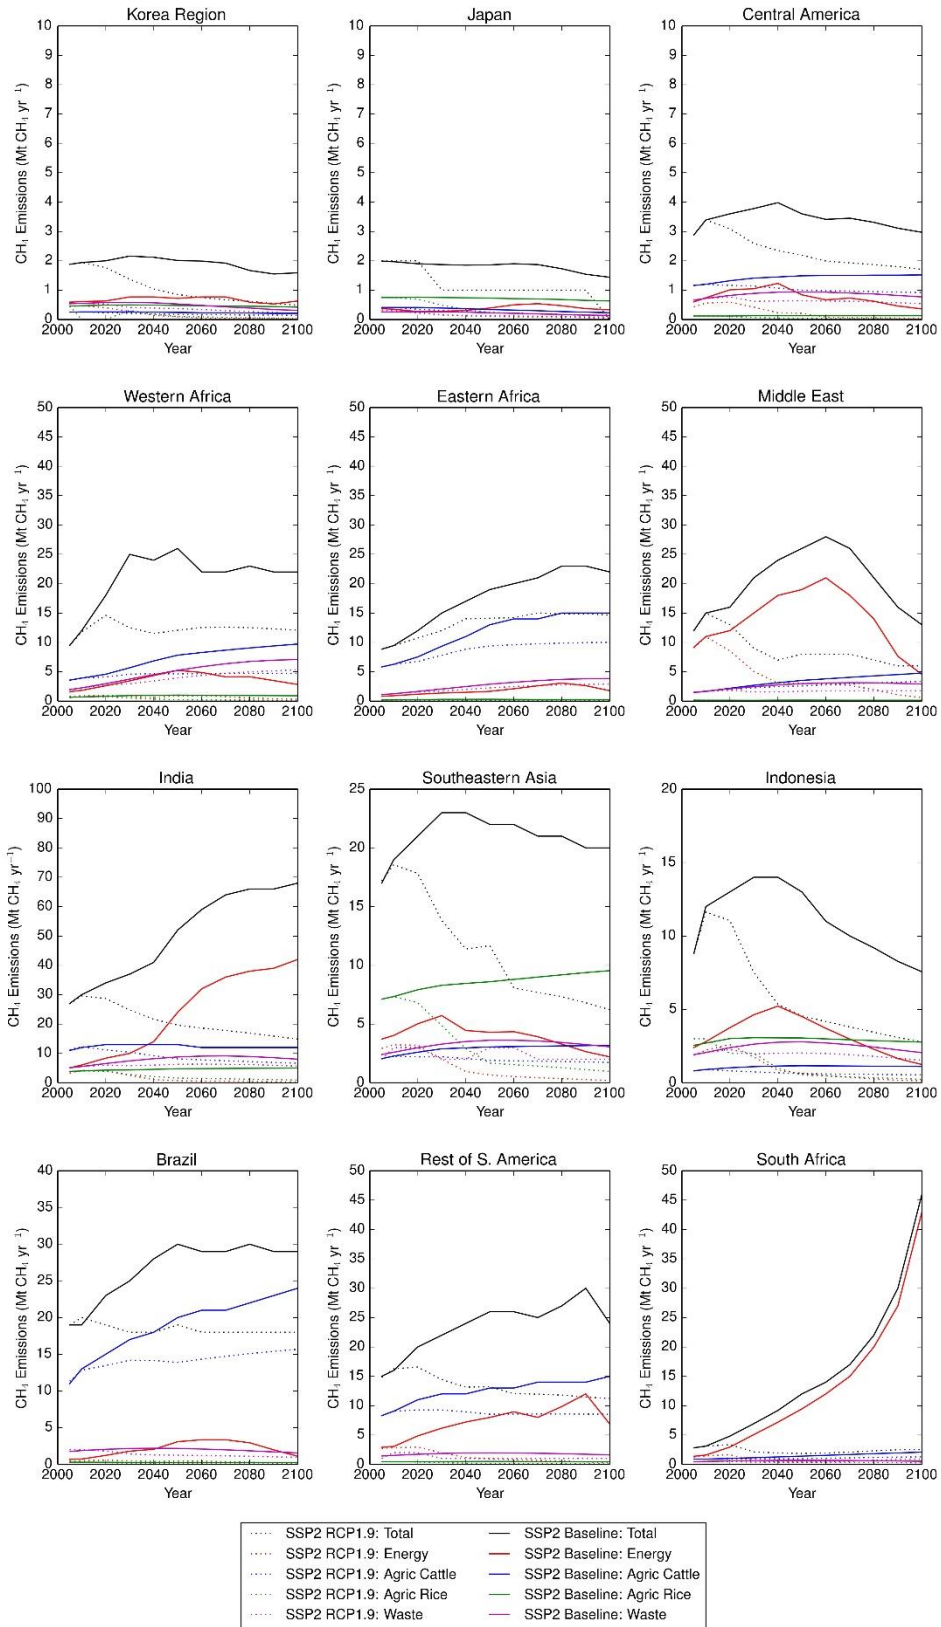

**Fig. SI.1 (continued)** | Time series of annual methane emissions between 2005 and 2100 from all and selected anthropogenic sources. Note the y-axes have different scales for clarity.

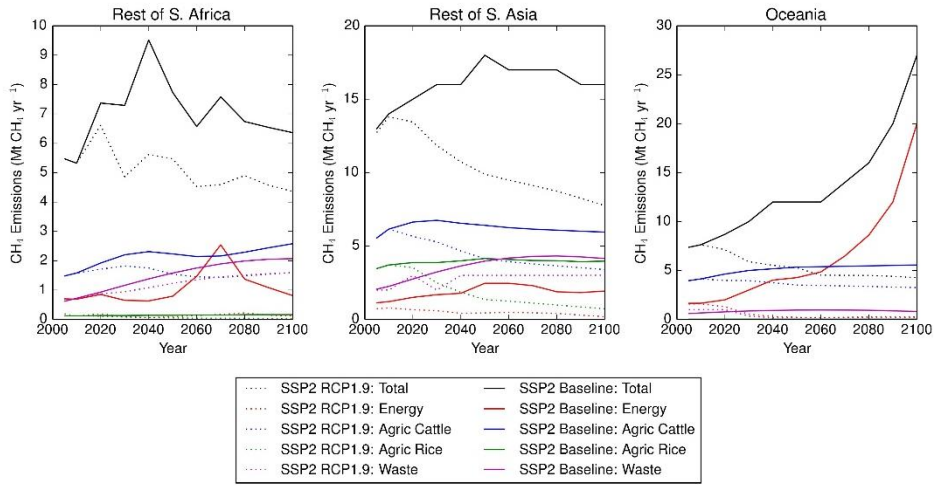

30

**Fig. SI.1 (continued)** | Time series of annual methane emissions between 2005 and 2100 from all and selected anthropogenic sources. Note the y-axes have different scales for clarity.

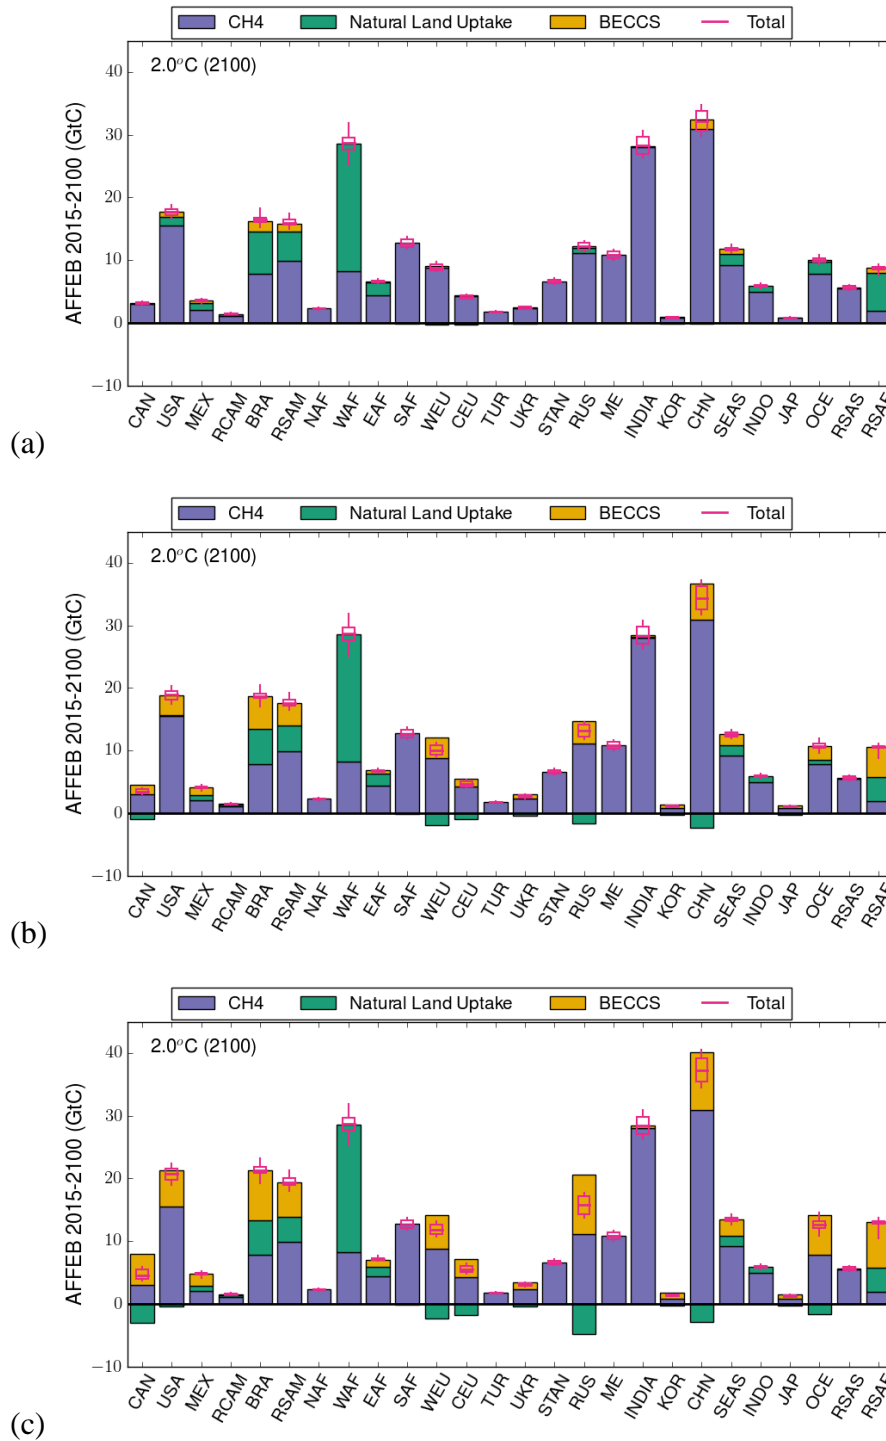

40 **Fig. SI.2 | Contribution of different mitigation options to the increase in allowable**  
 anthropogenic fossil fuel emission budgets by IMAGE region to meet the 2°C target. The  
 stacked bars represent the median methane mitigation potential (purple bars) and median land-  
 based mitigation potential (natural land uptake, green; BECCS, brown). Panel (a) is based on  
 a BECCS scaling factor of unity, (b) a BECCS scaling factor of 2 and (c) a BECCS scaling  
 factor of 3. The total (pink) shows the median and interquartile range for the 34 GCMs  
 45 emulated and 4 factorial sensitivity simulations.

**Fig. SI.3** | Time series of the land areas (in Mha) calculated for trees and prescribed for agriculture (including bioenergy crops) and bioenergy crops for the scenarios IM-1.9 ('BECCS', orange) and IM-1.9N ('no BECCS', green), as a difference to the baseline scenario (IM-BL), for the 26 IMAGE regions between 2000 and 2100. The dotted lines are the median and the spread the interquartile range for the 34 GCMs emulated and 4 factorial sensitivity simulations.

- a) Canada
- b) USA
- 55 c) Mexico
- d) Central America
- e) Brazil
- f) Rest of South America
- 60 g) Northern Africa
- h) Western Africa
- i) Eastern Africa
- j) South Africa
- k) Rest of Southern Africa
- 65 l) Western Europe
- m) Central Europe
- n) Turkey
- o) Ukraine Region
- p) Central Asia
- 70 q) Russia Region
- r) Middle East
- s) India
- t) Korea Region
- u) China
- v) South East Asia
- 75 w) Indonesia
- x) Japan
- y) Rest of South Asia
- z) Oceania

Fig. SI.3a: Canada

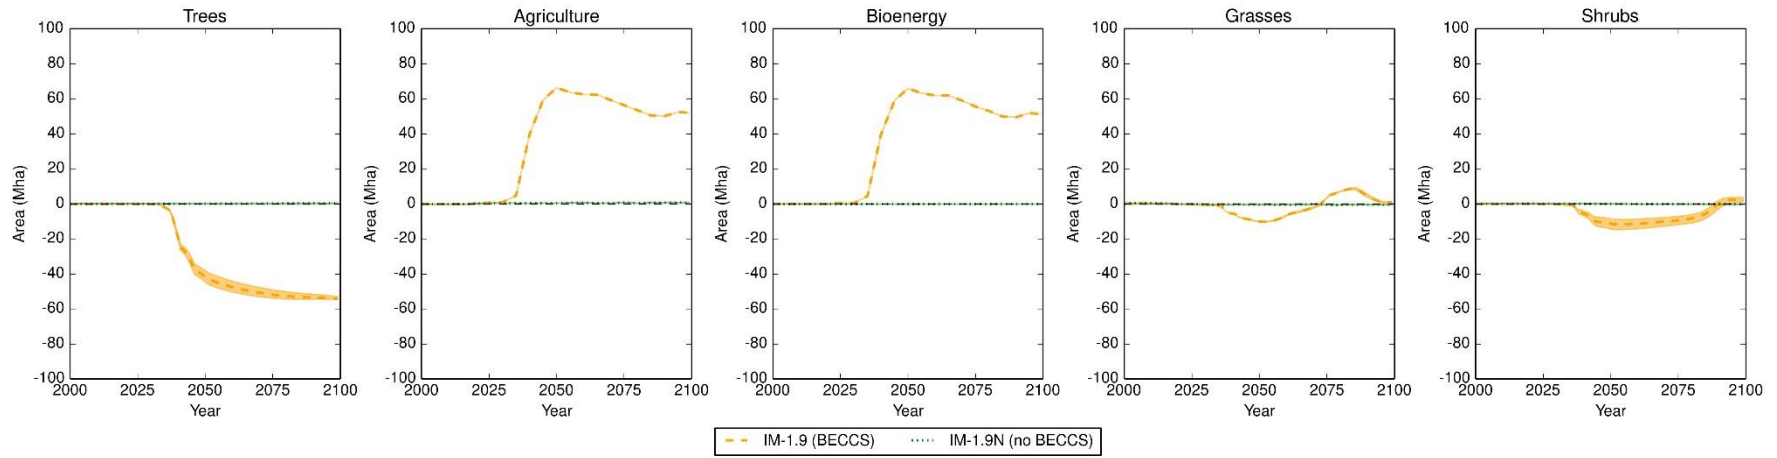

80

Fig. SI.3b: USA

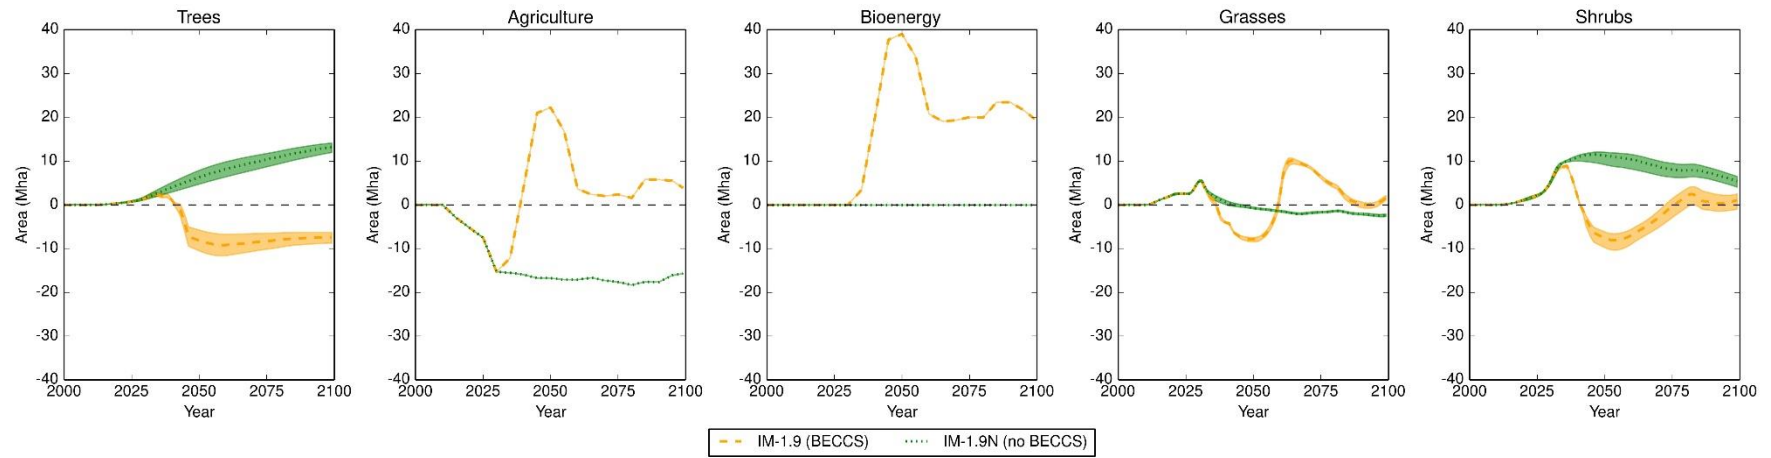

Fig. SI.3c: Mexico

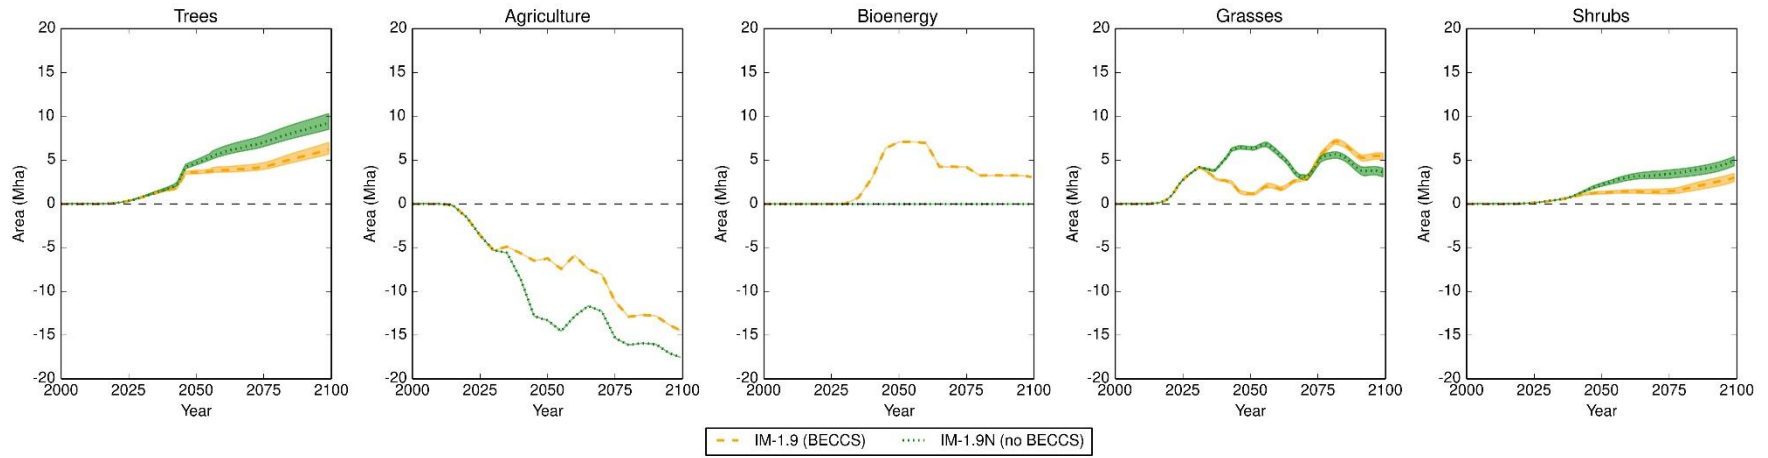

85

Fig. SI.3d: Central America

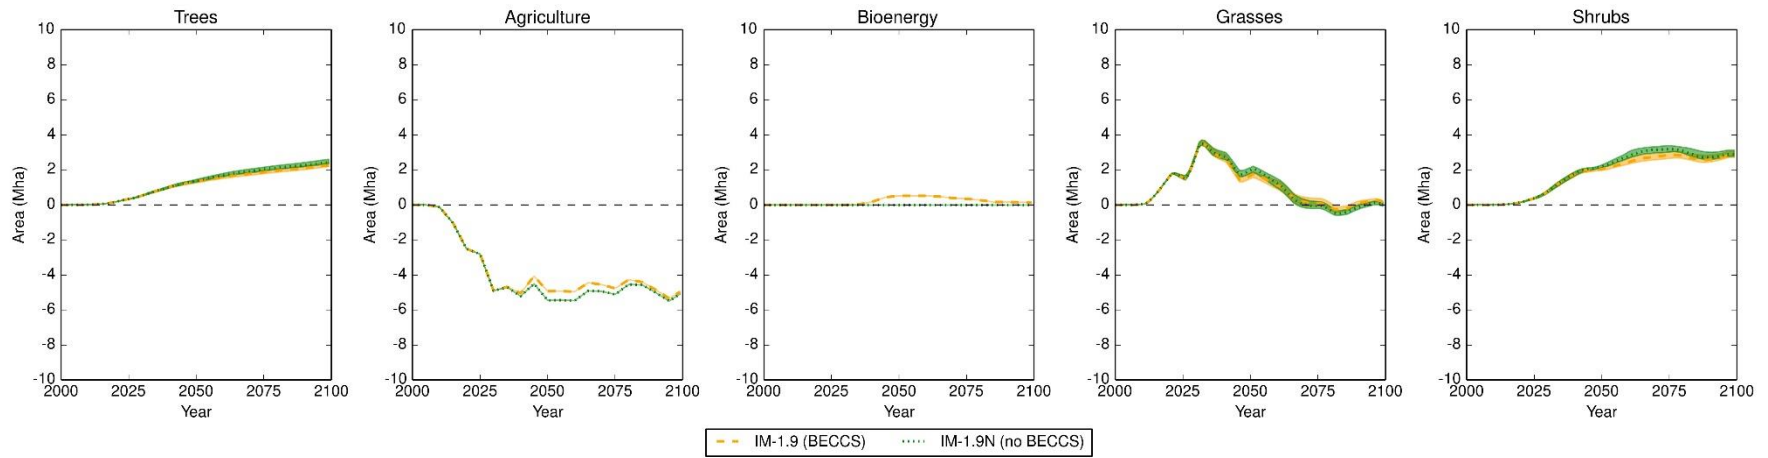



Fig. SI.3e: Brazil

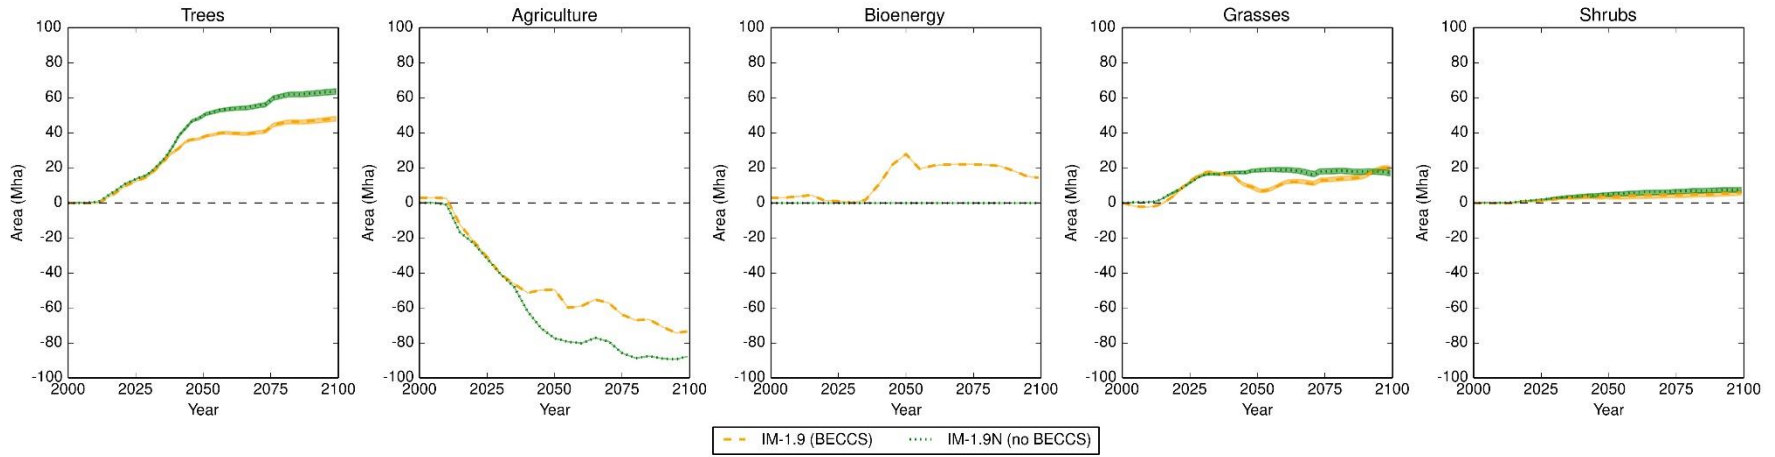

90

Fig. SI.3f: Rest of South America

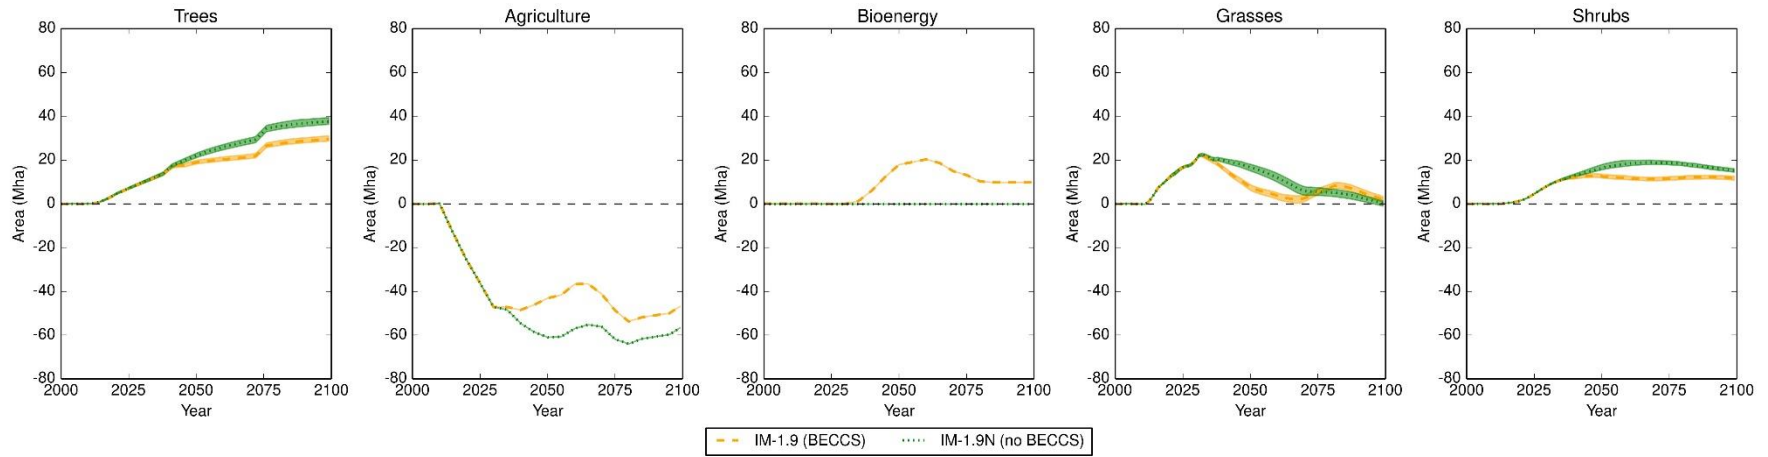

Fig. SI.3g: Northern Africa

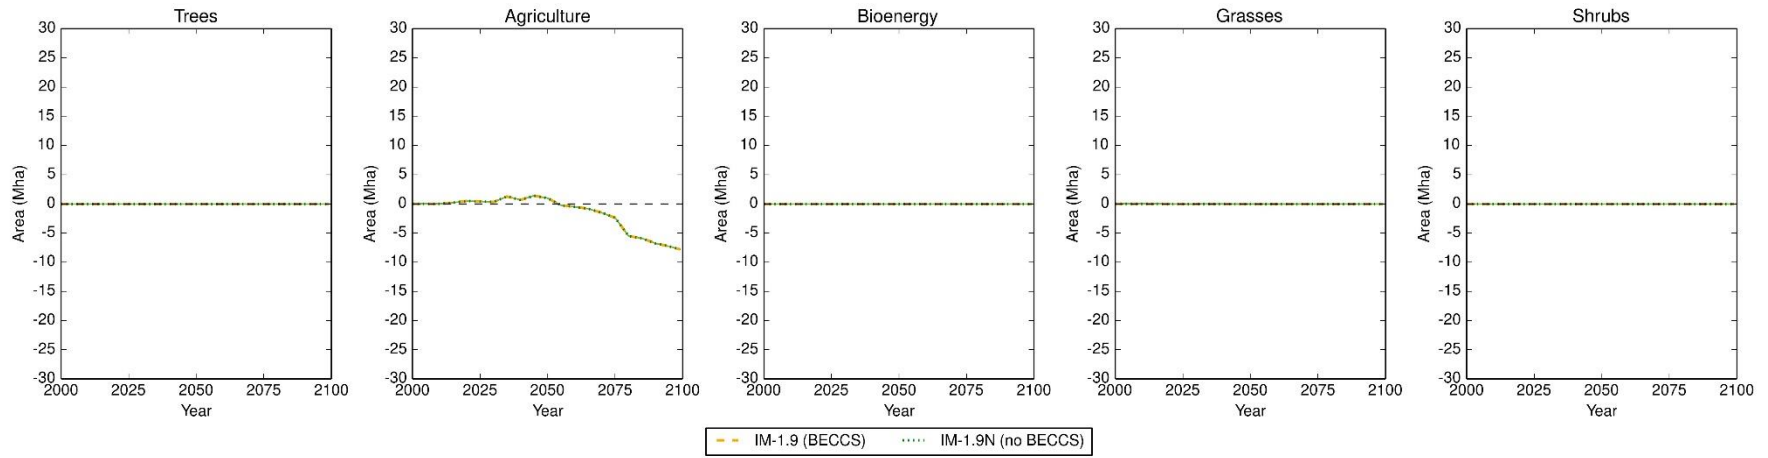

95

Fig. SI.3h: Western Africa

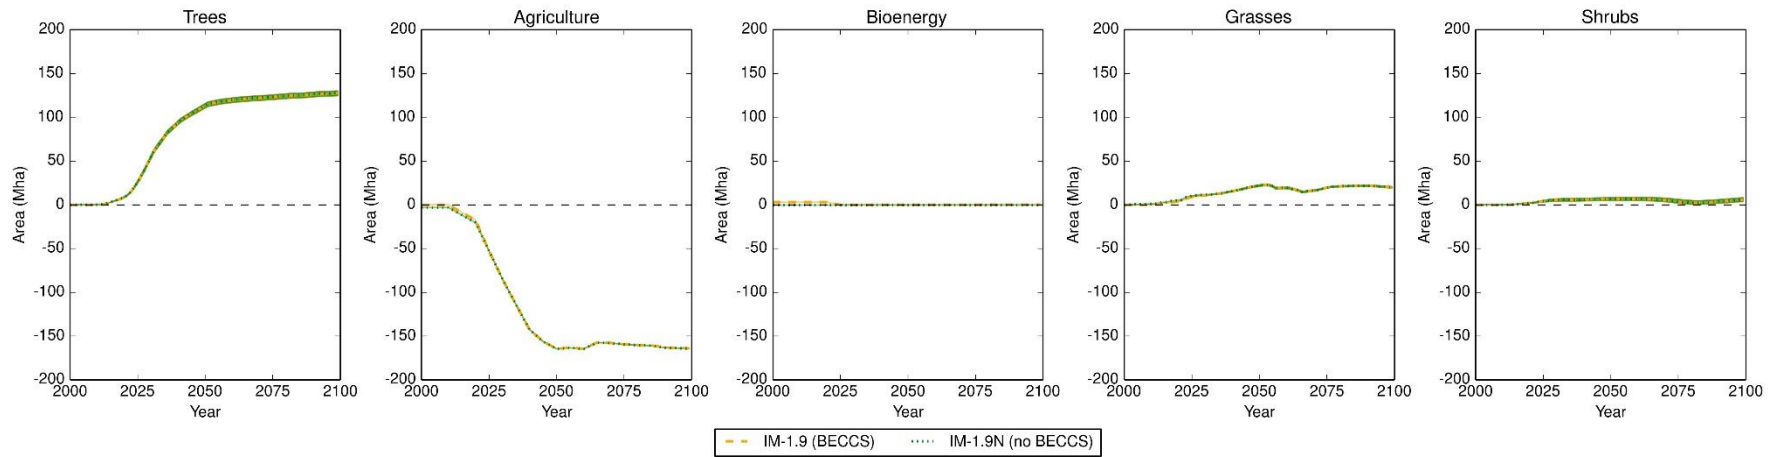

Fig. SI.3i: Eastern Africa

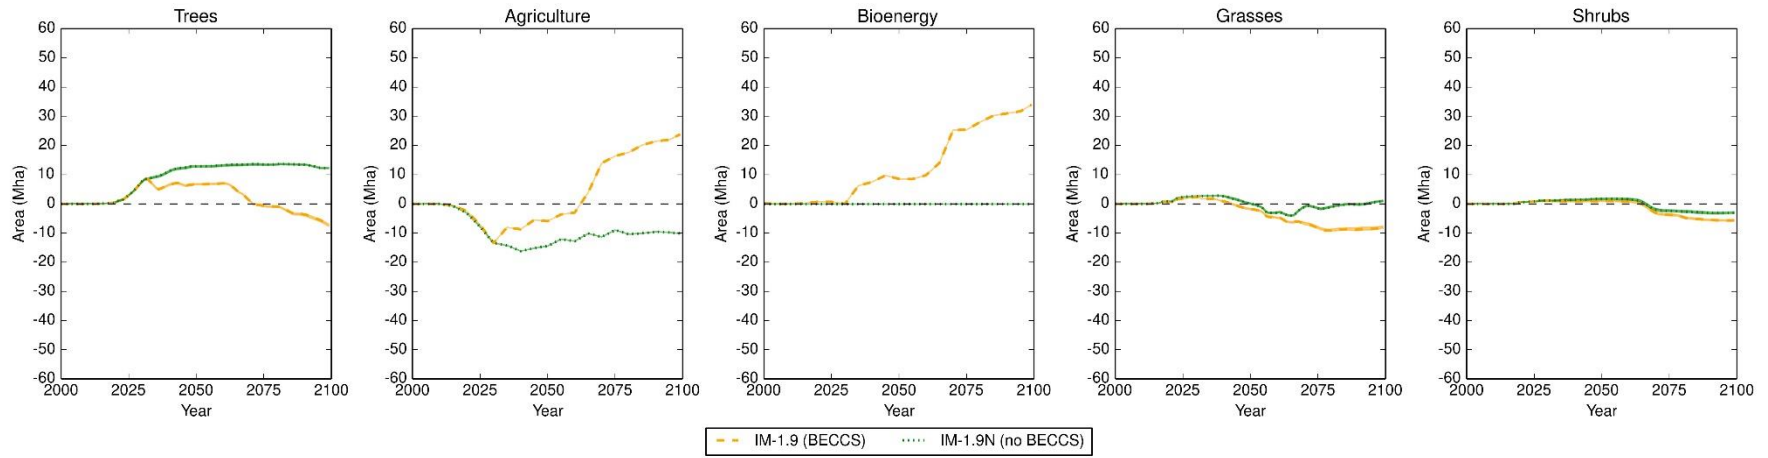

100

Fig. SI.3j: South Africa

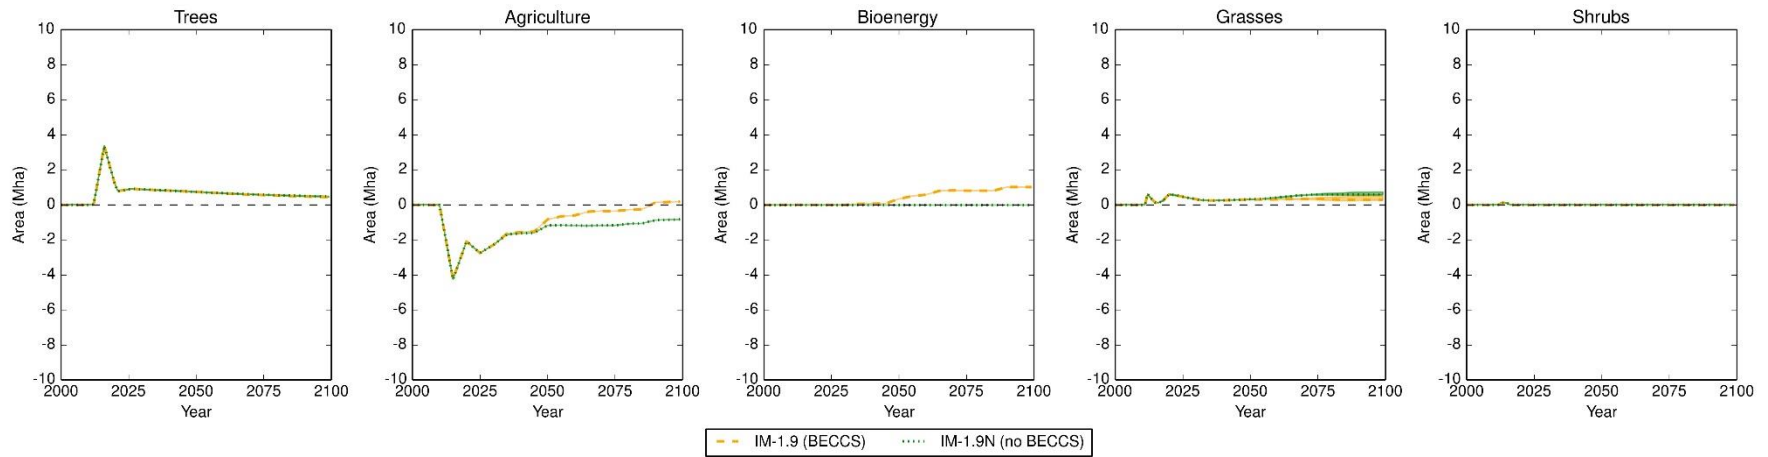

Fig. SI.3k: Rest of Southern Africa

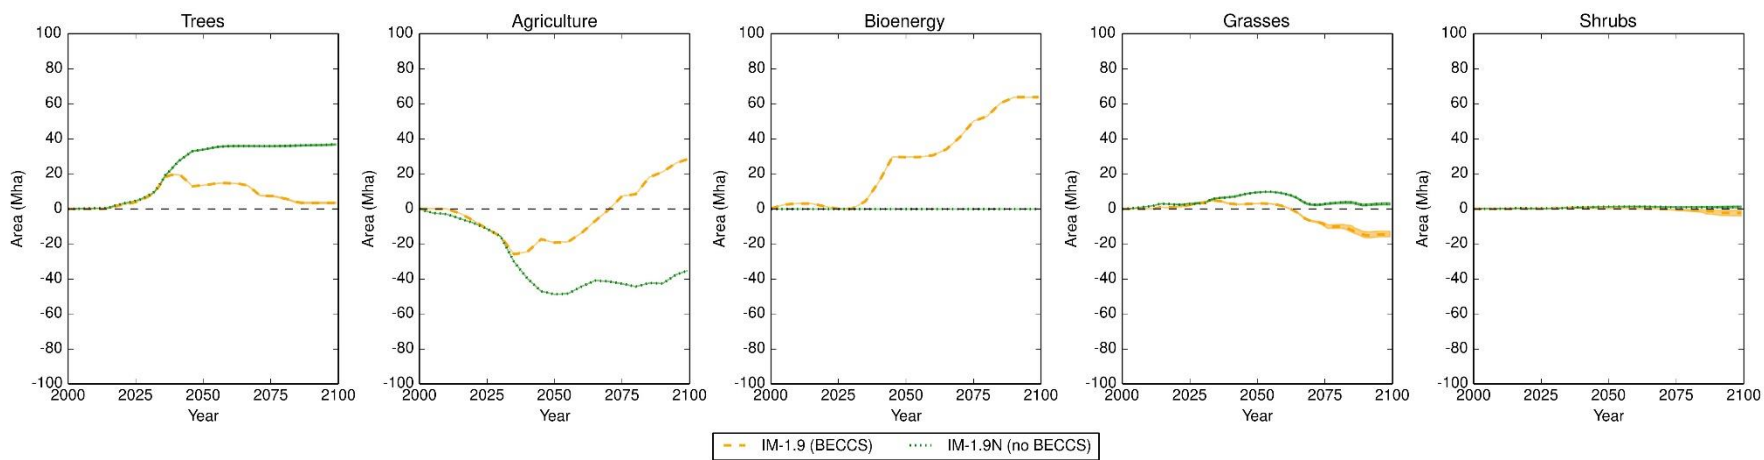

105

Fig. SI.3l: Western Europe

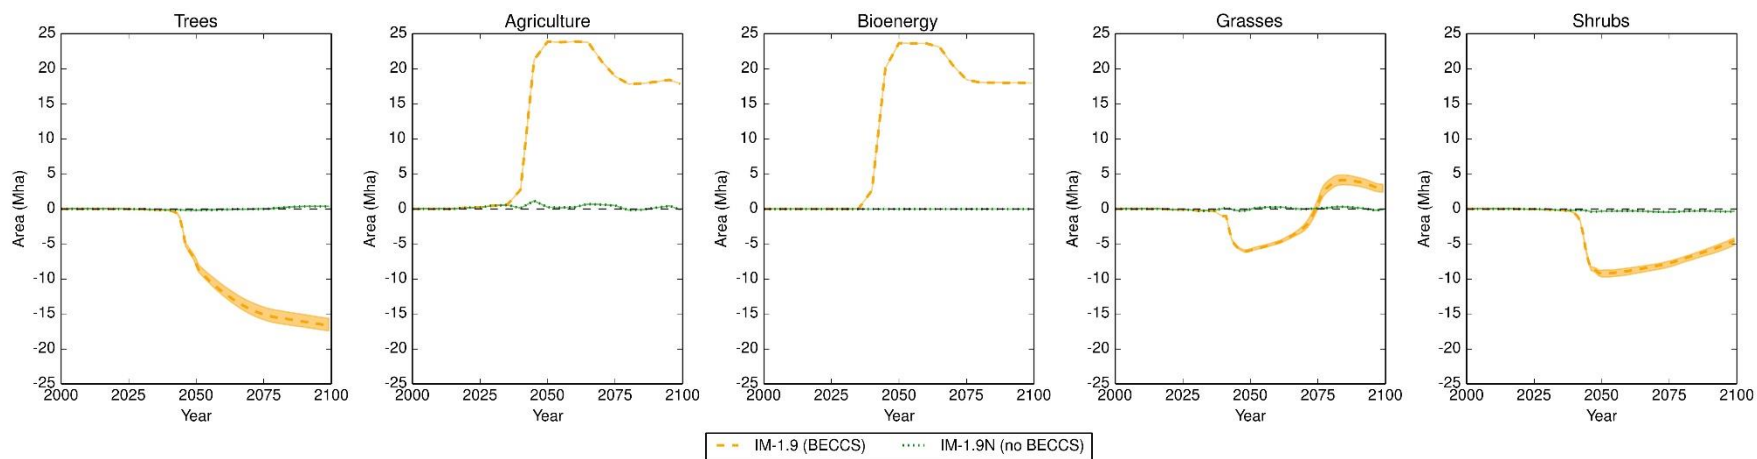

Fig. SI.3m: Central Europe

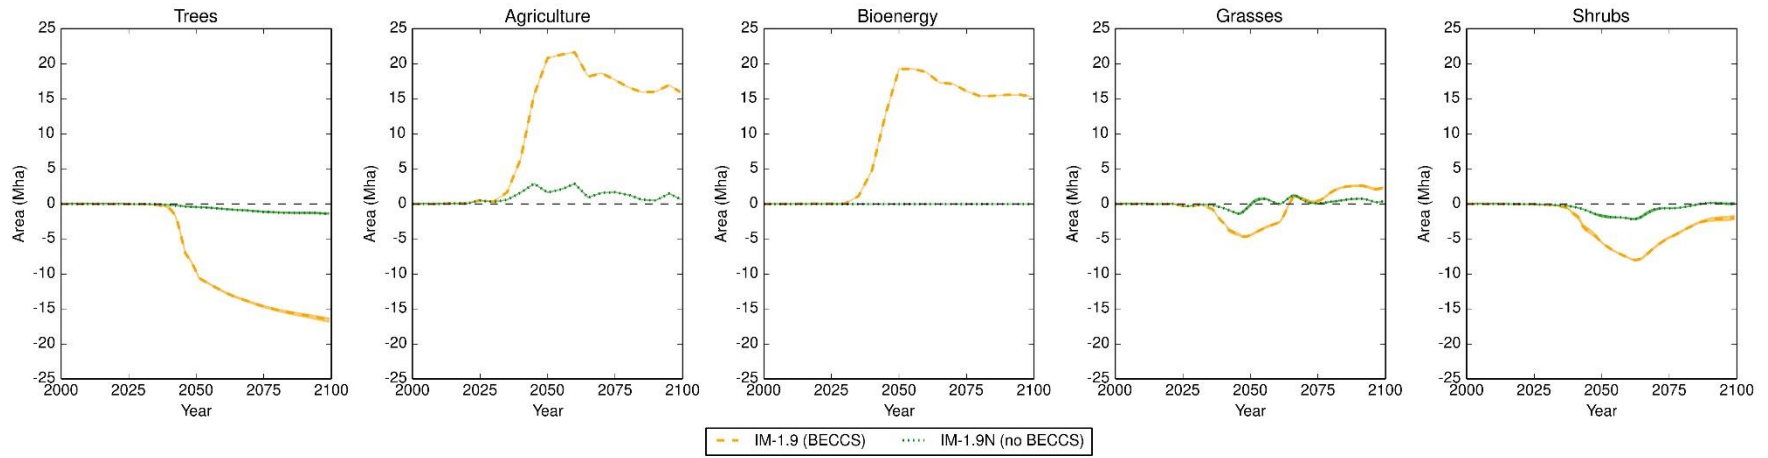

110

Fig. SI.3n: Turkey

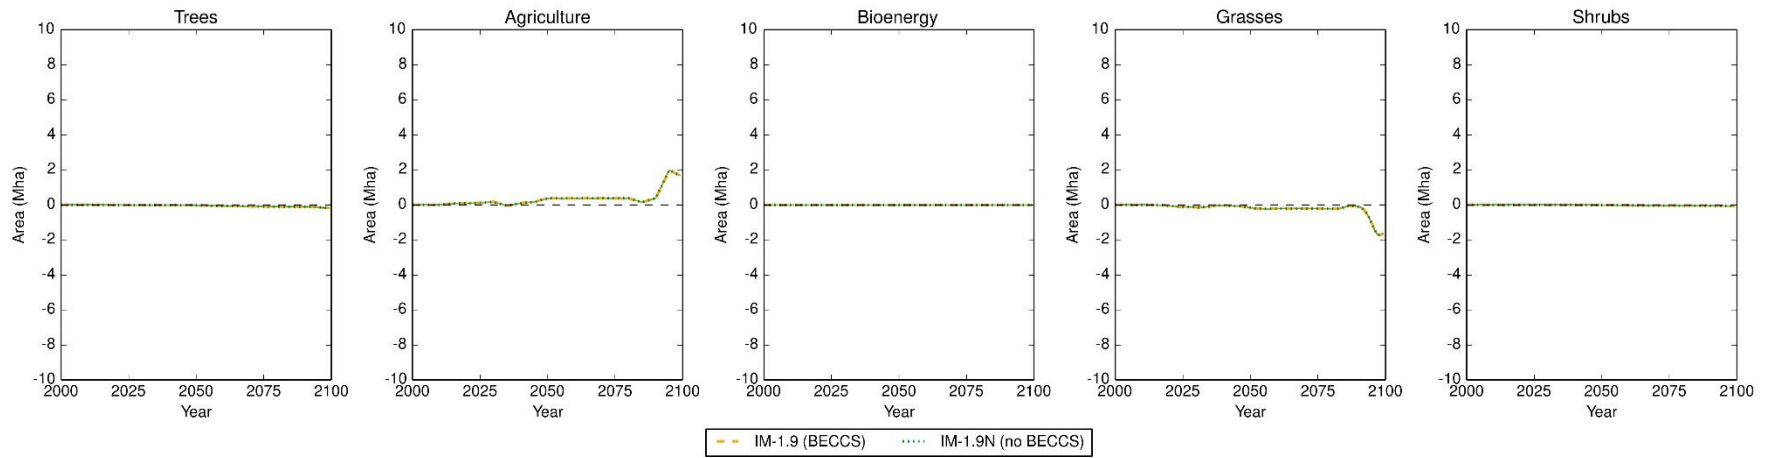

Fig. SI.3o: Ukraine Region

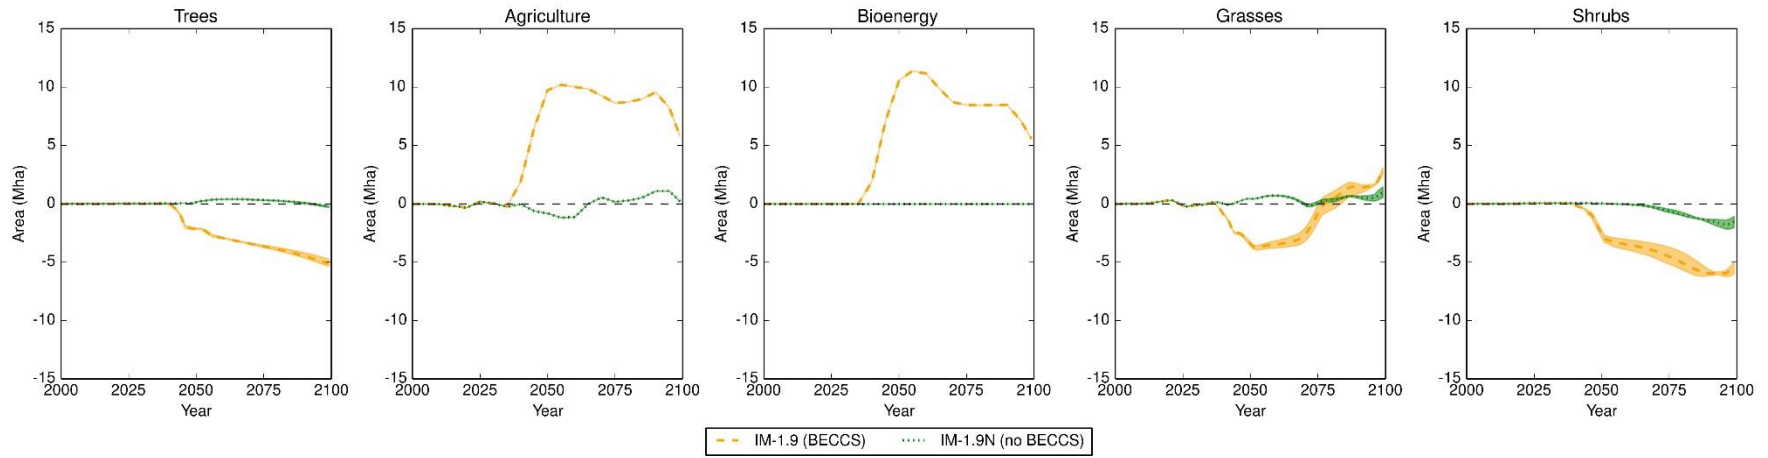

115

Fig. SI.3p: Central Asia

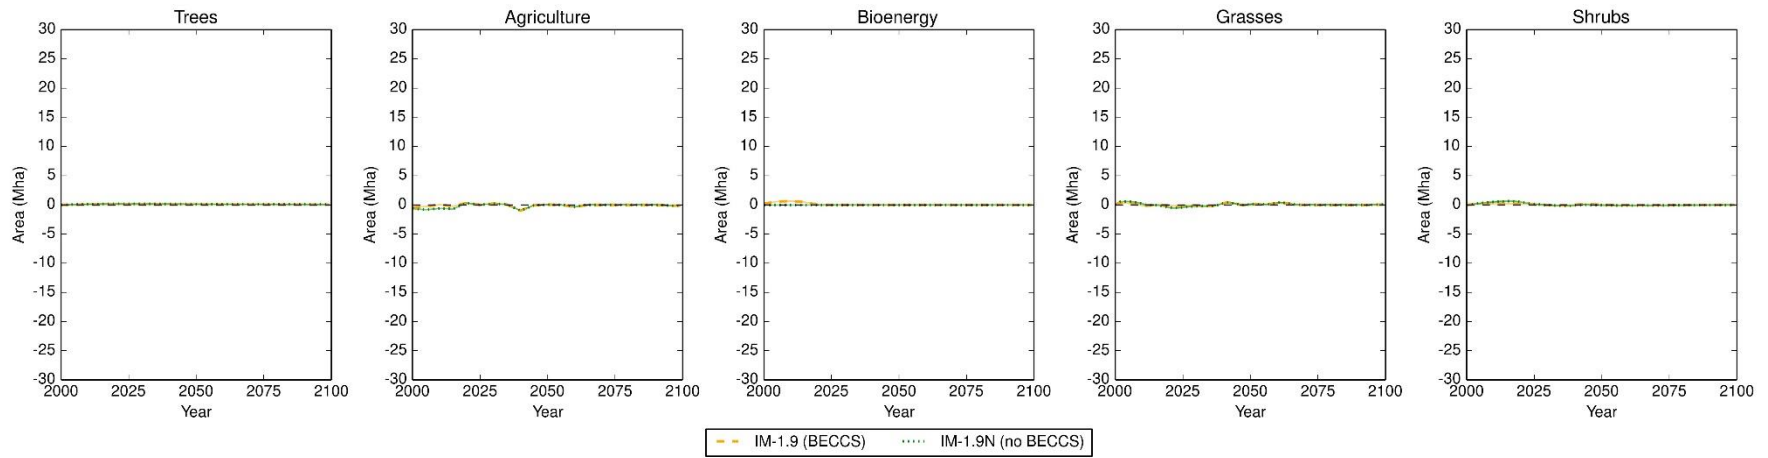

Fig. SI.3q: Russia Region

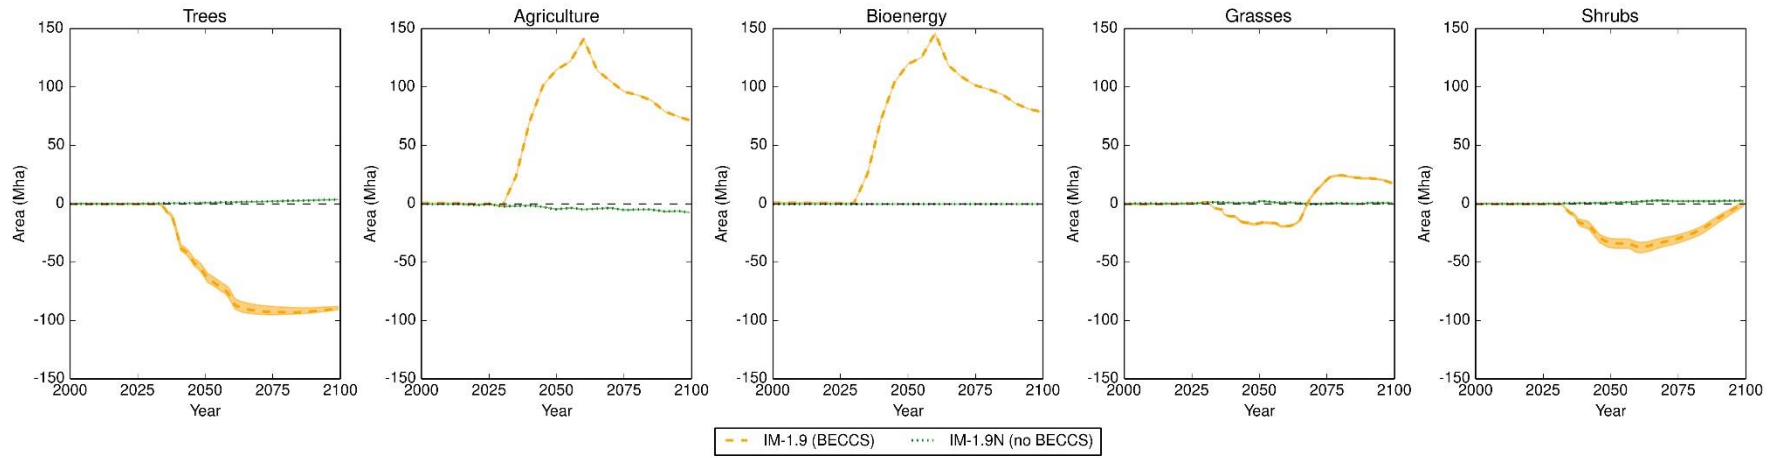

120

Fig. SI.3r: Middle East

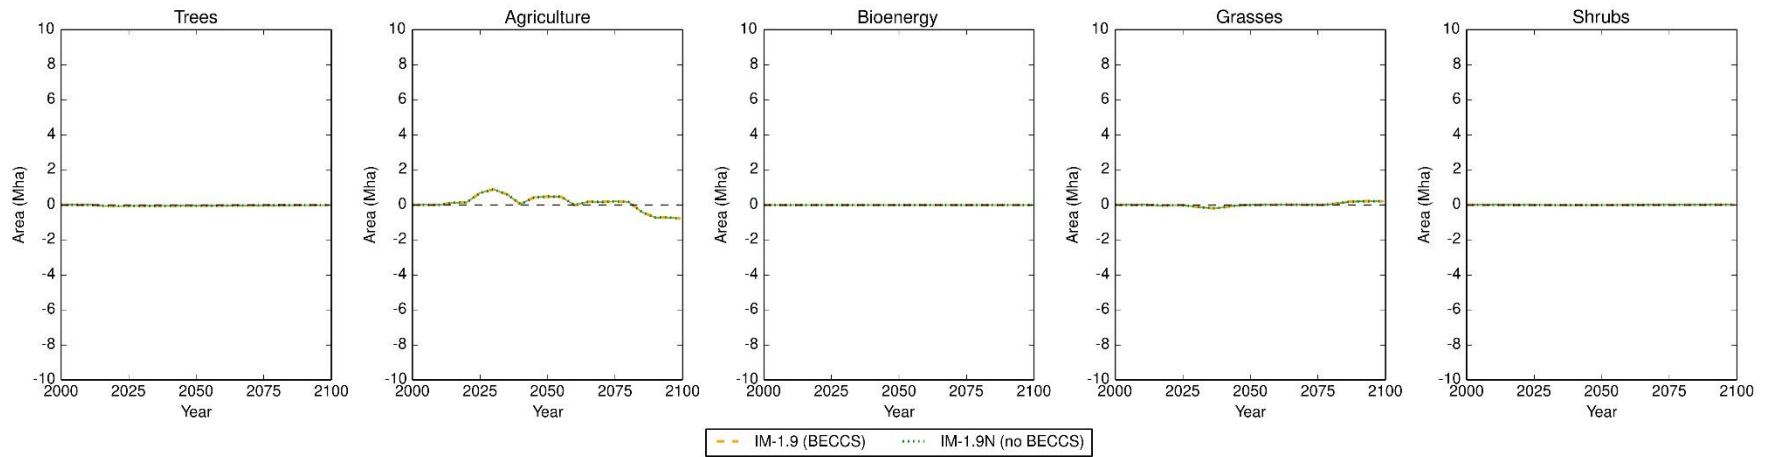

Fig. SI.3s: India

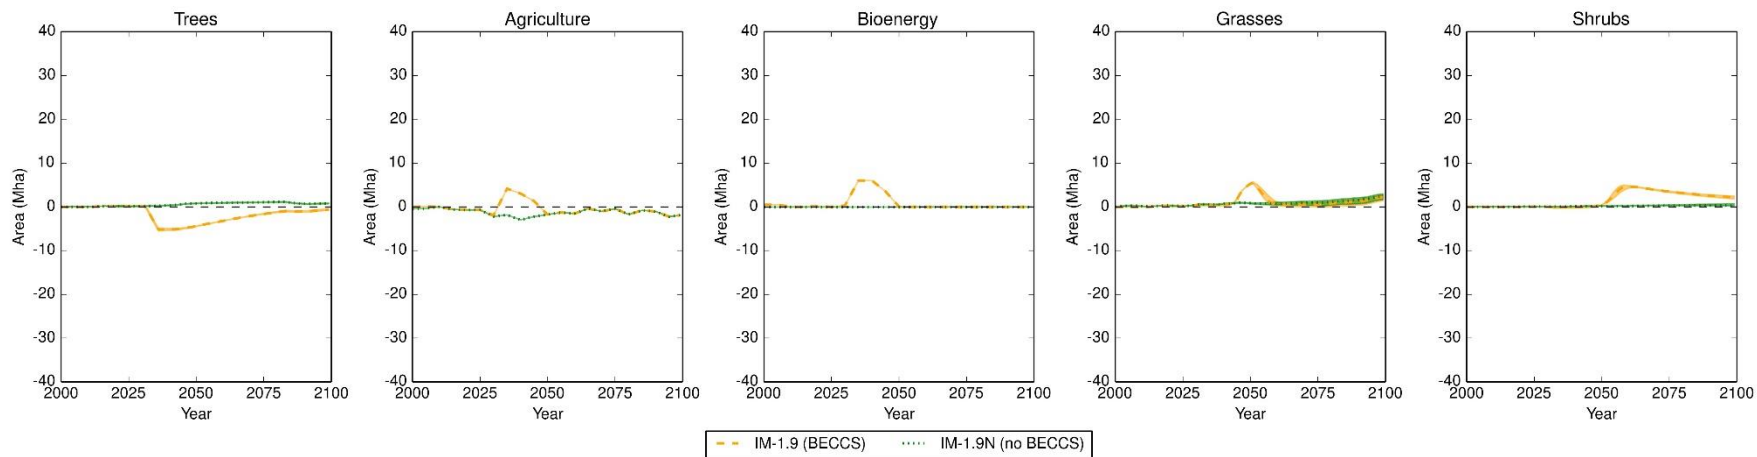

125

Fig. SI.3t: Korea Region

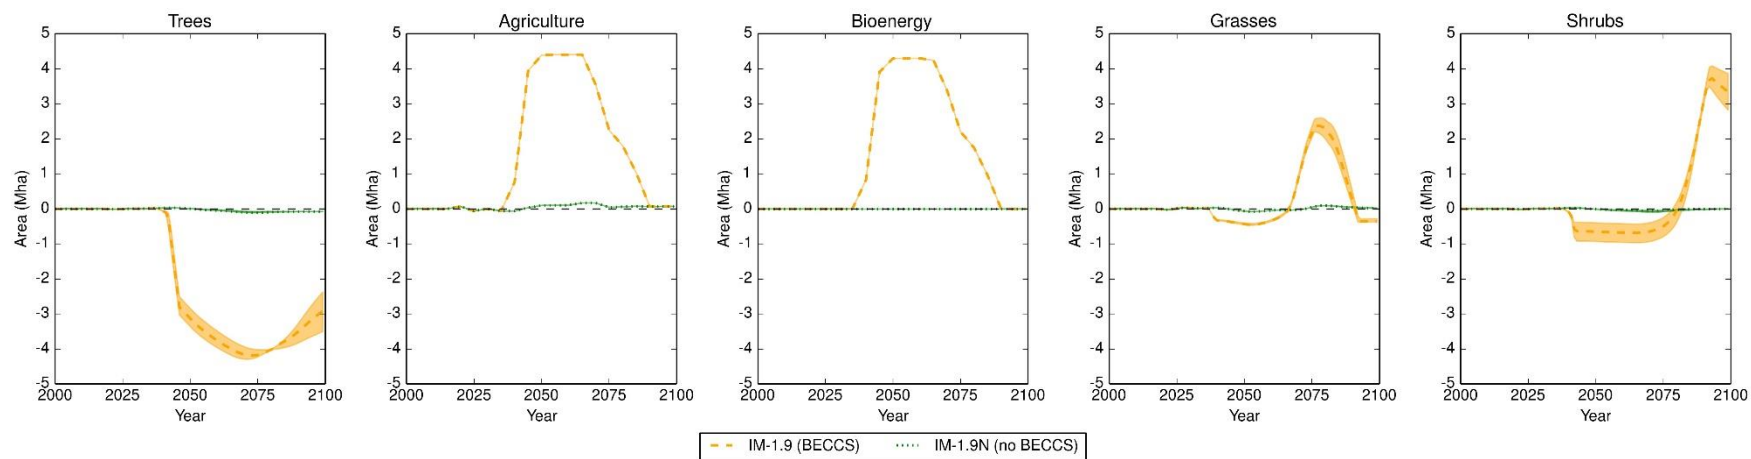



Fig. SI.3u: China

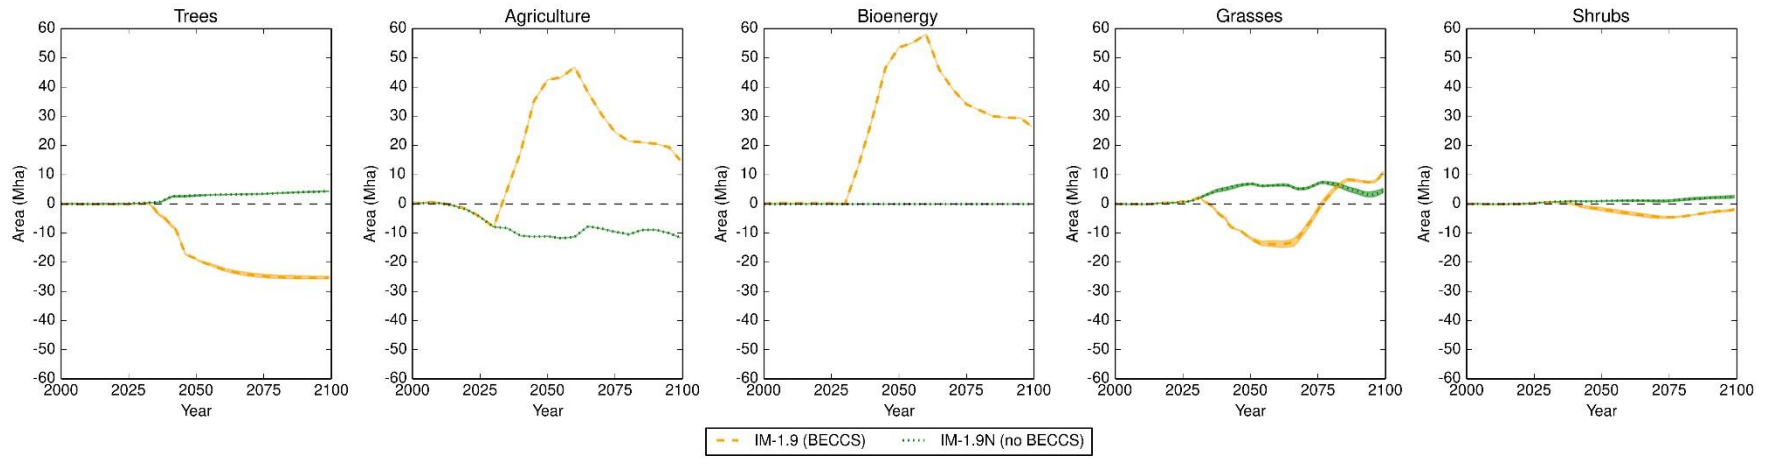

130

Fig. SI.3v: South East Asia

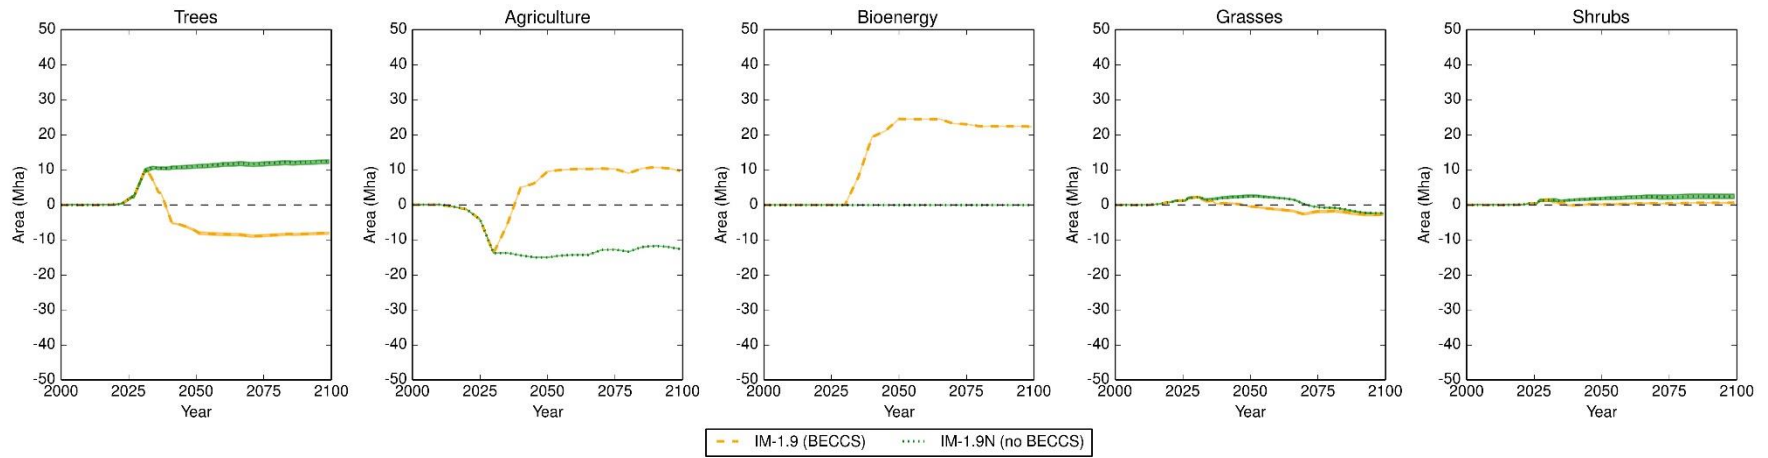

Fig. SI.3w: Indonesia

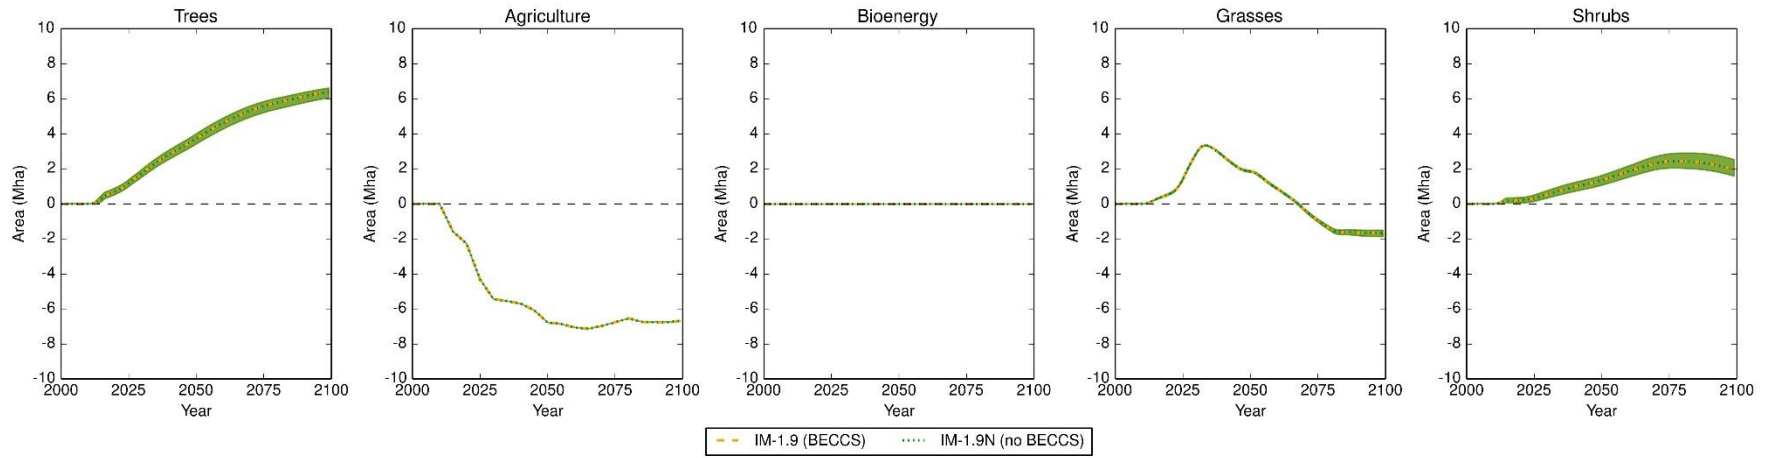

135

Fig. SI.3x: Japan

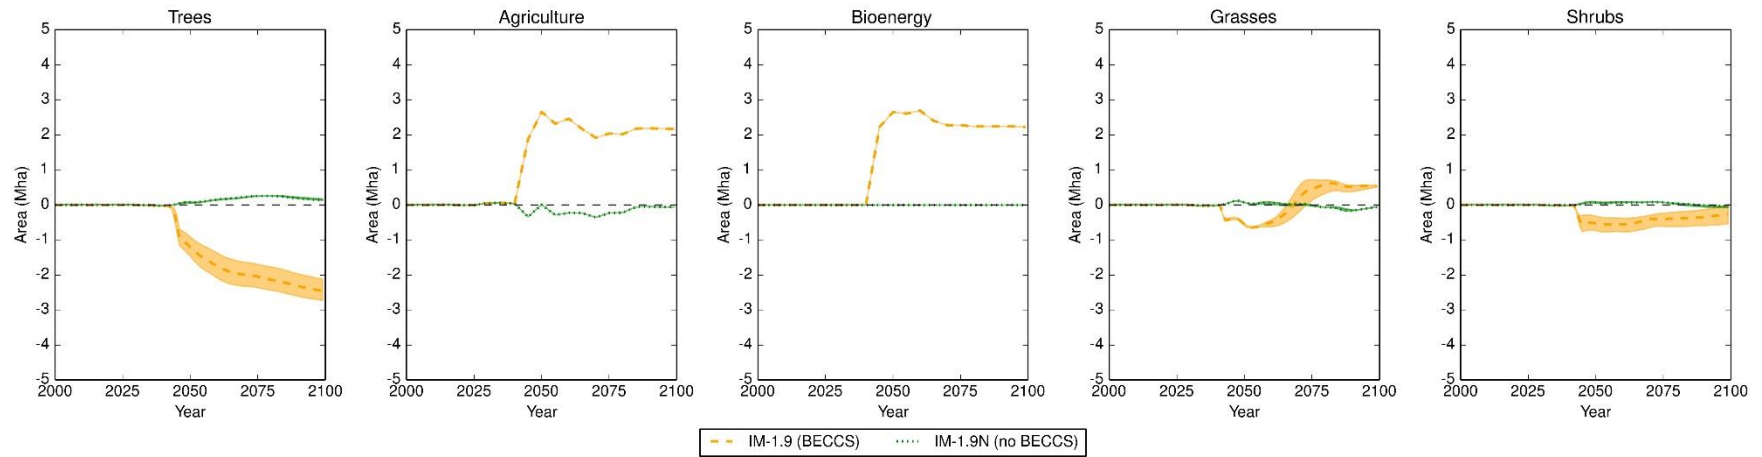

Fig. SI.3y: Rest of South Asia

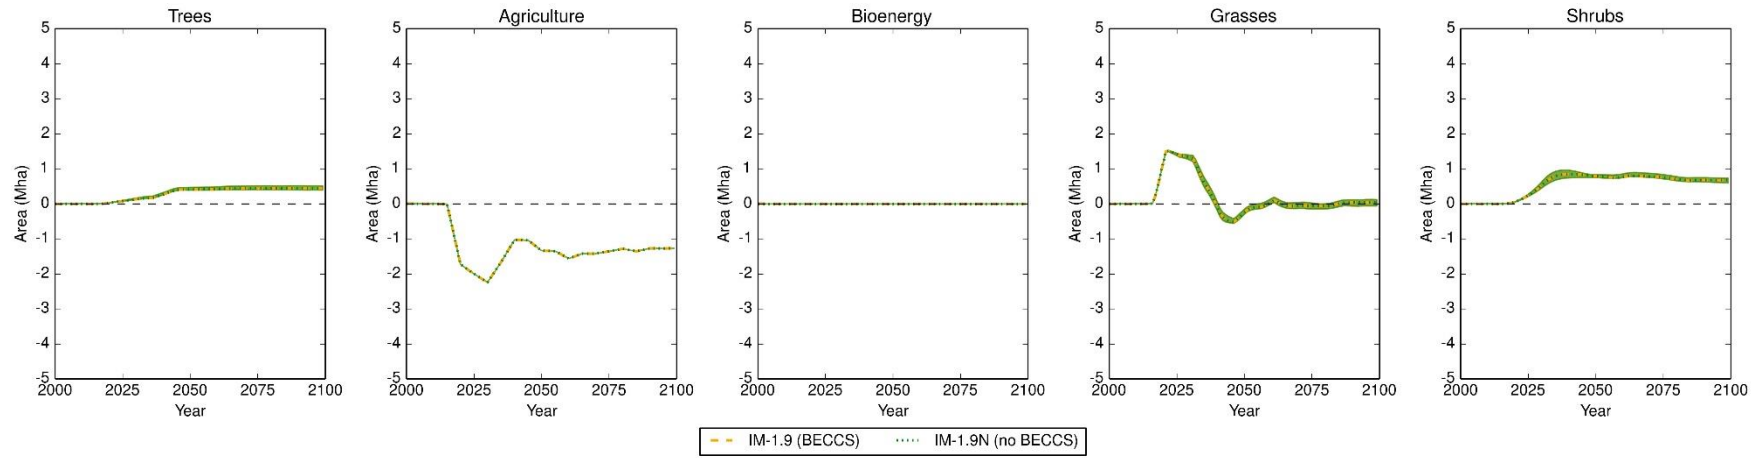

140

Fig. SI.3z: Oceania

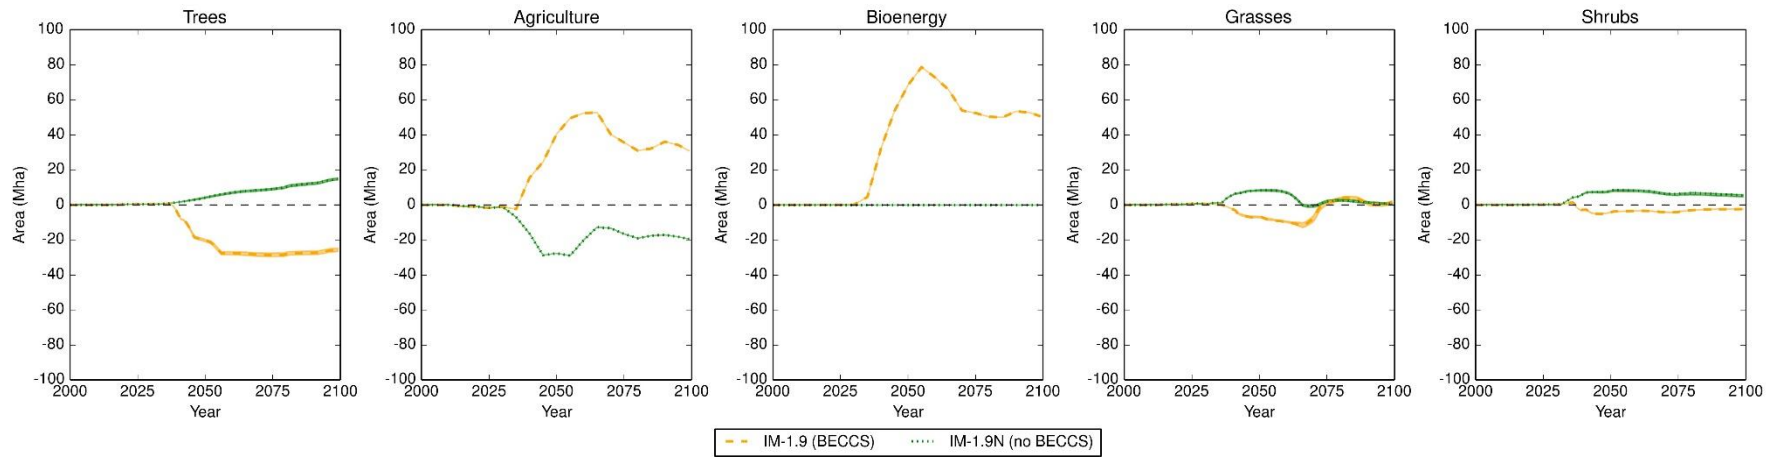

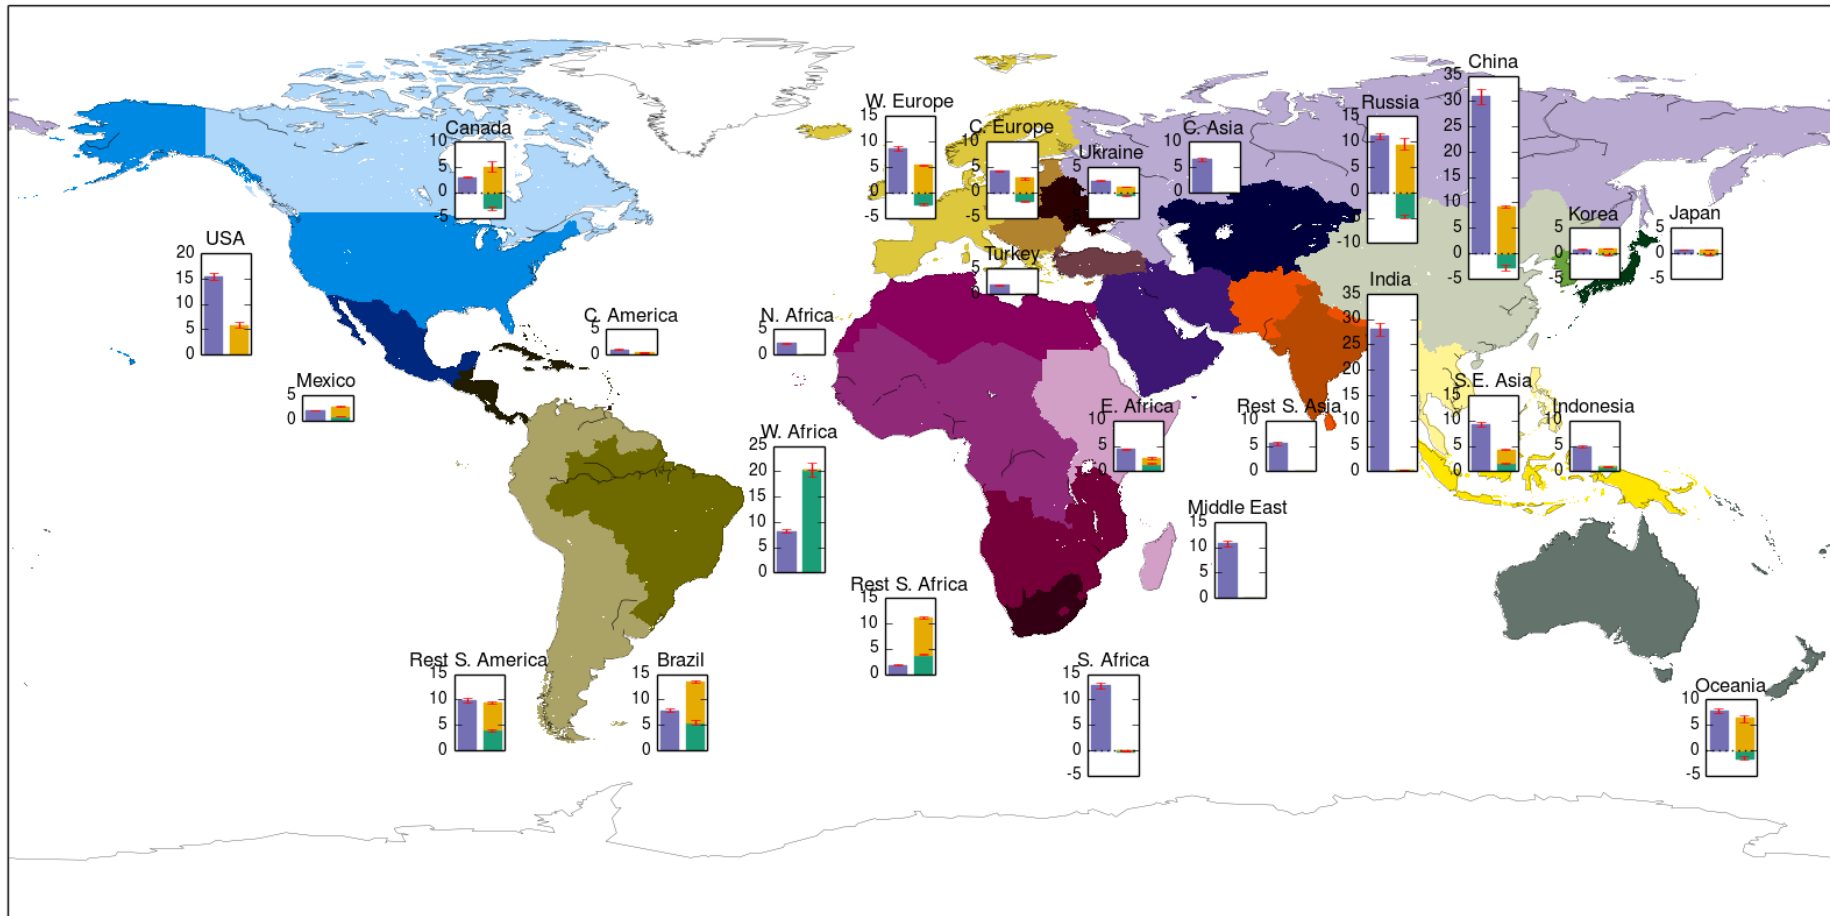

145 **Fig. SI.4 | Contribution of different mitigation options to the allowable anthropogenic carbon emission budgets by region.** The contribution to the allowable carbon emission budgets (GtC) between 2015 and 2100 for each of the 26 IMAGE IAM regions from methane mitigation (purple bars) and land-based mitigation options (green: natural land uptake; yellow: BECCS with  $\kappa = 3$ ), for the temperature pathway stabilising at 2°C warming without overshoot. The bars and error bars respectively show the median and the interquartile range, from the 34 GCMs emulated and 4 factorial runs.

150 **Table SI.1** | Mitigation options, estimated maximum reduction potential and the accompanying marginal price for mitigation of different anthropogenic methane source sectors for 2050 and 2100 [based on Lucas et al., 2007].

| Source Sector                     | Mitigation option(s)                                                                                                                               | Max. possible reduction relative to baseline (%) | Marginal price of max. reduction (1995 US\$/tC <sub>eq</sub> ) |
|-----------------------------------|----------------------------------------------------------------------------------------------------------------------------------------------------|--------------------------------------------------|----------------------------------------------------------------|
| Coal production                   | Maximising methane recovery from underground mining of hard coal                                                                                   | 90 (2050)<br>90 (2100)                           | 500 (2050)<br>500 (2100)                                       |
| Oil/gas production & distribution | Control of fugitive emissions from equipment and pipeline leaks, and from venting during maintenance and repair.                                   | 75 (2050)<br>90 (2100)                           | 300 (2050)<br>500 (2100)                                       |
| Enteric fermentation              | Change of animal diet and use of more productive animal types.                                                                                     | 50 (2050)<br>60 (2100)                           | 1000 (2050)<br>1000 (2100)                                     |
| Animal waste                      | Capture and use of methane emissions through anaerobic digesters.                                                                                  | 50 (2050)<br>60 (2100)                           | 1000 (2050)<br>1000 (2100)                                     |
| Wetland rice production           | Changes to (1) the water management regime to reduce the period of anaerobic conditions in flooded fields; (2) the soils to reduce methanogenesis. | 80 (2050)<br>90 (2100)                           | 1000 (2050)<br>1000 (2100)                                     |
| Landfills                         | (1) Reduced amount of organic material deposited in landfills;<br>(2) capture of methane                                                           | 90 (2050)<br>90 (2100)                           | 500 (2050)<br>500 (2100)                                       |
| Sewage and wastewater             | (1) More wastewater treatment plants and also recovery of the methane from the plants; (2) More aerobic wastewater treatment.                      | 80 (2050)<br>90 (2100)                           | 500 (2050)<br>500 (2100)                                       |
| Other anthropogenic sources       | Note 1                                                                                                                                             | -                                                | -                                                              |

**Note:** (1) These sources are either difficult to abate (e.g., land clearing for agricultural extension, and the use of traditional biomass for energy production and cooking) or are too small (e.g., methane emissions from industry, iron and steel production and the chemical sector).

**Reference:** Lucas, P. L., van Vuuren, D. P., Olivier, J. G. J. & den Elzen, M. G. J., 2007: Long-term reduction potential of non-CO<sub>2</sub> greenhouse gases. *Environmental Science & Policy* **10**, 85-103, doi: <https://doi.org/10.1016/j.envsci.2006.10.007>.
